# 1 **Prevalence of and risk factors for high-risk HPV and cervical cytological** 2 **abnormalities in women living with HIV in Bali, Indonesia**

3

4 I Ketut Agus Somia<sup>1</sup>, Made Lady Adelaida Purwanta<sup>2</sup>, Ni Wayan Winarti<sup>3</sup>, Ida Bagus Nyoman  
5 Putra Dwija<sup>4</sup>, Desak Made Putri Pidari<sup>5</sup>, A.A.S. Sawitri<sup>6</sup>, Anak Agung Ayu Yuli Gayatri<sup>7</sup>, I  
6 Nyoman Gede Budiana<sup>8</sup>, Komang Januartha Putra Pinatih<sup>9</sup>, Ketut Tuti Parwati Merati<sup>10</sup>

7 <sup>1,3,7,8</sup> Prof dr IGNG Ngoerah Hospital – Faculty of Medicine, Udayana University Denpasar Bali

8 <sup>2,4,6,9,10</sup> Faculty of Medicine, Udayana University Denpasar Bali

9 <sup>5</sup> Kerti Praja HIV Foundation Clinic Denpasar Bali

10 \*Corresponding author: I Ketut Agus Somia; Department of Internal Medicine, Tropical and  
11 Infectious Disease Division, Udayana University/Prof. dr. I.G.N.G Ngoerah General Hospital,  
12 Denpasar, Bali, Indonesia; email: [agus\\_somia@yahoo.co.id](mailto:agus_somia@yahoo.co.id)

13

## **Abstract**

14 **Background:** Women living with HIV face a higher risk of developing cervical cancer compared  
15 to those without HIV. However, comprehensive cervical cancer screening programs for this  
16 population are still lacking in Indonesia. This has resulted in many cases of late-stage cervical  
17 cancer being diagnosed, especially in Bali, which has experienced an increase in cases of HIV and  
18 cervical cancer. This study aimed to determine the prevalence of and risk factors for cervical  
19 cytological abnormalities in women living with HIV in Bali and to explore their relationship with  
20 high-risk HPV (HR-HPV) types.

21 **Methods:** This is a cross-sectional study with eligible participants recruited from outpatient HIV  
22 clinics in Bali. Between July to December 2023, participants were interviewed to collect  
23 demographic and historical medical information, followed by physical examination including  
24 collection of cervical swabs and blood samples. Pap smear sampling and swab collection using  
25 ThinPrep for cytology. HPV DNA was then identified by PCR and genotyped for HR-HPV  
26 16,18,31,33,35,39,45,51,52,56,58,59,66,68. Blood samples were analyzed for CD4 and CD8 cell  
27 counts.

28 **Results:** A total of 245 women with HIV at median age of 38 years old (24-50 years) and with  
29 median time of ARV therapy of 7 years (0-18 years) were enrolled. Only 239 participants were  
30 included in the analysis for their valid initial results. Overall, 26 (10.87%) of samples showed  
31 abnormal cytology including 6 (2.5%) ASC-H, 9 (3.8%) ASC-US, 4 (1.7%) H-SIL and 7 (2.9%)  
32 L-SIL. Of the 58 (24%) that tested positive for HPV DNA, 18 (31%) samples had abnormal  
33 cytology. HPV 18 was the most common genotype detected (n=16 or 28%). Bivariate analysis  
34 revealed a significant association between positive HPV DNA and abnormal cytology, with those  
35 testing HPV-positive having seven times higher risk of ASC-US or greater  
36 (PR=7.022;95%CI=3.223-15.295). Multivariate regression identified having HPV 18 infection as

37 an independent risk factor for abnormal cytology (ExpB=9.029;p=0.007), and a history of Pap  
38 smear screening associated with reduced risk of HR-HPV infection (ExpB=0.358;p=0.013).

39 **Conclusion:** In our study, 10.87% of women living with HIV had abnormal cytology and 24%  
40 had positive HPV DNA tests. HPV 18 was associated with a greater risk of abnormal cytology  
41 compared to other high-risk HPV strains, but our sample size was small. History of pap smear was  
42 also shown to decrease the risk of HR-HPV infection. The results underscore the need for increased  
43 vaccination of younger women and screening of all women living with HIV in Indonesia in order  
44 to improve their cervical health outcomes.

45

46 **Keywords:** High-risk HPV, cervical abnormalities, cervical cytological abnormalities, HIV, risk  
47 factors

48

## 49 **Introduction**

50 Cervical cancer is one of the most frequently detected cancers in women living with HIV  
51 and is classified as an AIDS-defining illness. From the meta-analysis of 24 studies shows that  
52 women living with HIV have six times higher risk of developing cervical cancer compared to those  
53 without HIV.(1) Globally, an estimated 6% of new cervical cancer cases in 2018 were diagnosed  
54 among women living with HIV and 5% of all cases were attributable to HIV infection.<sup>1</sup> IARC  
55 2021 data shows that in Indonesia, 0.3% of cervical cancer cases were caused by co-infection with  
56 HIV. Due to being immunocompromised, women living with HIV are more prone to high-risk  
57 HPV strains that often cause cervical cancer, this could even result in the persistence of the HPV  
58 infection.(2,3) This leads to the urgency in early detection and management of cervical cancer in  
59 the population of women living with HIV.

60 Cervical cancer screening in HIV population is crucial to avoid further complication and  
61 mortality. Screening is the main strategy to reduce cervical cancer incidence, by detecting pre-  
62 cancerous lesions that can be treated before evolving to cancer. This, which is followed by  
63 adequate management is one of two prevention tools recommended by WHO that are highly  
64 effective. Based on CDC guidelines, for woman with newly diagnosed HIV-infection, the first  
65 cervical cancer screening is recommended by the time of HIV diagnosis and repeated on 6 or 12  
66 months after diagnosis.(4) Effectiveness of the disease's management is influenced by not only  
67 the accuracy of the screening method but also by the coverage of the cervical cancer treatment.  
68 However, in reality many countries have yet conducted established screening program for cervical  
69 cancer in this specific population, especially those of developing countries.

70 Indonesia was still considered at a low rate of cervical cancer screening (12%) per 2020,  
71 resulting in an emergency situation for cervical cancer until recently.(5) Many patients came to the  
72 hospital with their end-stage cancer due to the late diagnosis. On the other hand, there has also  
73 been increasing number of HIV cases. Based on the recapitulation data of the early detection of  
74 cervical cancer in Indonesia 2016, the number of suspected cervical cancer in several provinces  
75 such as Jakarta were 269 cases, Bali with 254 cases and Bangka Belitung with 227 cases. The  
76 data showed that Bali was one of the areas with high cervical cancer rates in 2016. Furthermore,

77 this number increased in 2019 for Bali with the incidence of cervical cancer of 437 cases. On the  
78 other hand, Bali was on the sixth position for the highest HIV cases in Indonesia with 28,376 cases  
79 until June 2022 as stated by the Indonesian Ministry of Health June 2022.(6)However, there has  
80 yet been any data on the number of cervical cancer in this HIV population.

81 A number of risk factors could also influence the risk of cervical cytological abnormalities  
82 and cervical cancer in women living with HIV. Besides late screening, it was thought that late  
83 ART initiation or at lower CD4 cell counts could increase the risk of developing cervical cancer.  
84 ART are expected to decrease viral load and help improve CD4 cell counts, thus enhancing  
85 clearance of HPV and reducing the incidence of cervical cytological abnormalities.(2) Therefore,  
86 inequities in access to effective cervical cancer screening and treatment of precancerous cervical  
87 lesions are likely to be the main driver of high invasive cervical cancer rates in women living with  
88 HIV.

89 Due to the reasoning above, we would like to determine the prevalence and risk factors of  
90 cervical cytological abnormalities in women living with HIV in Bali, Indonesia, as well as to find  
91 its association with the high-risk HPV possible of cervical cancer. This study will provide not only  
92 the actual data of the local population to define future action in eradicating cervical cancer, but  
93 also directly provide benefit in the form of early detection for women living with HIV in Bali.

## 94 **Methods**

### 95 ***Study design and setting***

96 This research was an observational study with cross-sectional design carried out at Yayasan  
97 Kerti Praja HIV foundation Denpasar Bali clinic 26<sup>th</sup> of July 2023 – 11<sup>th</sup> of December 2023. The  
98 respondents were women living with HIV who had regular appointments at the HIV clinics in Bali.  
99 All participants gave their consent by signing on a written informed consent. This study has been  
100 granted an ethical statement from the Ethic Committee of Faculty of Medicine, Udayana  
101 University with the number: 1661/UN14.2.2.VII.14/LT/2023.

102

### 103 **Patient selection and sampling**

104 We included all women living with HIV of age 18-50 years old that attended the clinics. The  
105 inclusion criteria: 1) women living with HIV of age 18-50 years old; 2) Indonesian nationality; 3)  
106 has had sexual intercourse and willing to give their informed consent and exclusion criteria: 1)  
107 mentally unstable; 2) cervical cancer patients; 3) on menstruation during data collection; 4)  
108 pregnant women; 5) history of previous pap smear and/or HPV testing in the last 6 months; 6) on  
109 treatment of all types of pre-malignancy or malignancy and/or had hysterectomy.

110 Number of samples were calculated based on the sample size formula for cross-sectional  
111 design of proportional outcome. With the level of acceptable error of 5% and the expected  
112 proportion in population of 19.05%,(7) and at the 5% types I error rate, the minimum number of  
113 samples required was 237. Potential candidates were approached with consecutive sampling.

114 We screened 300 eligible candidates of women living with HIV, where these women had no  
115 certain symptoms, but rather concern regarding their predisposition to the disease. The screening  
116 procedure was done in a similar way to one of the algorithms (Algorithm 3) in the WHO Guidelines

117 of Cervical Cancer Screening.(8) For research purpose, all participants in the study went through  
118 cytology screening with ThinPrep pap smear and HPV DNA testing simultaneously. This was  
119 done altogether to give a complete picture of all participants involved in this study as part of the  
120 Indonesian ethnicity.

121

## 122 **Study procedures**

123 Blood samples were analyzed for CD4 and CD8 cell counts using the flow cytometry method using  
124 FACSVia (R656874100022) / FASClyric tool (R659180000700)

## 125 ***Cytology identification***

126 Cytological tests were performed by liquid based preparation technique (ThinPrep, Hologic, Inc.,  
127 USA). All specimens were taken using ThinPrep swab kit, processed with a ThinPrep machine,  
128 stained with Papanicolaou stain, and assessed microscopically by a pathologist based on The  
129 Bethesda System criteria.

## 130 ***PCR for HPV DNA and genotyping***

131 Vaginal swab samples were collected and inserted into ThinPrep cytology media (ThinPrep  
132 PreservCyt Solution1 REF 70097-005—Hologic, Inc. Marlborough, MA, USA). Subsequently,  
133 the fluid in the cytology tube was vortexed, and 1 ml of ThinPrep fluid was transferred to a  
134 microcentrifuge tube. Centrifugation was performed at 12,000 RPM for 1 minute, and the pellet  
135 was washed with distilled water. DNA extraction was carried out using the Zymo Quick-DNATM  
136 Miniprep Plus Kit according to the manufacturer's instructions. The extracted DNA was then  
137 stored at -20°C until use. Next, PCR was performed with a total volume of 10 µl, consisting of 10  
138 nM forward and reverse primers, PCR mix, and distilled water. PCR was conducted in two stages;  
139 the first stage used the MY09/11 universal primers, and positive samples were followed by type-  
140 specific PCR using specific primers for HPV 16,18,31,33,35,39,45,51,52,58,59,66,68, and 69.  
141 PCR was carried out on a Veriti™ machine (AB Biosystem) with a denaturation PCR program  
142 of 95°C for 5 minutes, followed by 35 cycles of 95°C for 1 minute, 95°C for 20 seconds, 55°C for  
143 45 seconds, 72°C for 60 seconds, and a final extension at 72°C for 7 minutes. PCR results were  
144 visualized using 1.5% agarose gel with GelRed staining under UV light

145

## 146 **Statistics**

147 Initially, descriptive statistics were used to summarize the demographic and clinical  
148 characteristics of the study population. The prevalence of cervical abnormalities and HPV  
149 infection rates were calculated. Bivariate analysis was conducted to explore the association  
150 between HPV DNA positivity and abnormal cytology results. The strength of this association was  
151 quantified using odd ratio (ORs) with corresponding 95% confidence intervals (CIs). Multivariate  
152 logistic regression analysis was then performed to identify independent risk factors for cervical  
153 abnormalities, adjusting for potential confounders that had association in bivariate analysis of less  
154 than 0.25. The significance of multivariate analysis was determined with a threshold of p-value  
155 less than 0.05. We used SPSS version 29 to conduct the analysis.

156

## 157 Results

158 From the targeted population, we received a list of 300 potential candidates for screening.  
159 After referred to the inclusion and exclusion criteria, we recruited 245 eligible participants, from  
160 which 239 samples (97.6%) were successfully analyzed. We had to repeat sampling 10 cases due  
161 to initial sampling inadequacy, attributed to challenging conditions such as difficult portio access  
162 or the presence of inflammatory cells. The research team gave significant efforts to communicate  
163 with participants requiring re-sampling, providing detailed explanations about the importance of  
164 the repeat pap smear procedure and the potential health benefits. Out of these ten needed to repeat,  
165 there were six samples excluded from the final analysis, two of these were due to suspected  
166 cervical cancer, and the other four were due to logistical issues (two participants relocated and  
167 could not return, and two declined to participate further despite multiple contact attempts, resulting  
168 in lost to follow up). The team still provided results from the initial tests along with health education  
169 and preventive advice concerning cervical cancer (see Figure 1).

170

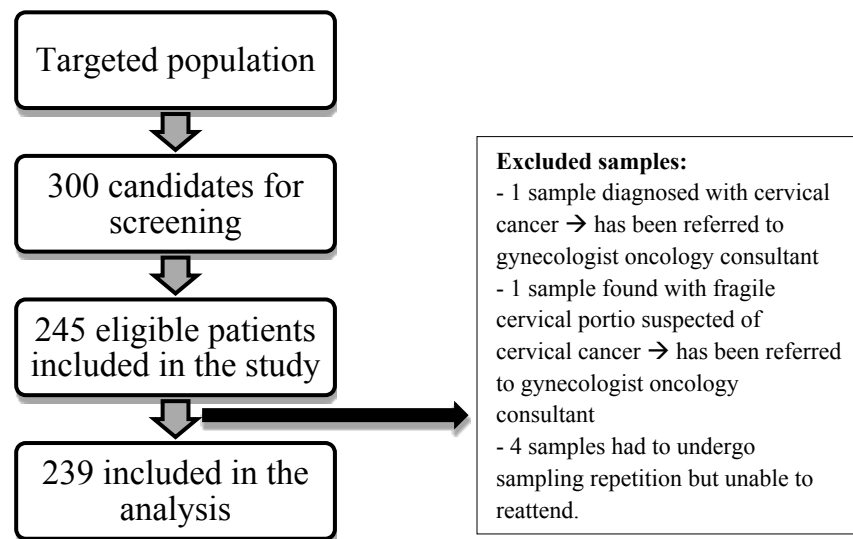

171

172

Figure 1. Recruitment process during the study

173

## 174 Baseline characteristics of study participants

175 Based on Table 1, the characteristics of study participants were grouped based on the  
176 presence or absence of cervical cytological abnormalities, categorized across various demographic  
177 and behavioral factors. The findings indicated that divorced individuals represented 8.8% of those  
178 with cytological abnormalities, while 91.3% did not have these conditions. Education levels  
179 revealed a slightly higher incidence cytological abnormalities among those with higher education,  
180 with those having completed high school or more showing a greater percentage compared to those  
181 with less education. Employment status correlated with cytological abnormalities prevalence,  
182 where 15.5% of unemployed participants had cytological abnormalities compared to 8.9% of  
183 employed participants. The analysis also considered lifestyle factors such as alcohol consumption

184 and contraception use, noting that none of the alcohol consumers in the study had cytological  
 185 abnormalities, and those using contraception exhibited a higher percentage of cytological  
 186 abnormalities than those who did not. Sexual behavior was also a factor, with participants who had  
 187 more sexual partners or an earlier sexual debut showing slightly higher percentages of cytological  
 188 abnormalities. Additional factors like gravidity, hormonal medication use, and history of abortion  
 189 were examined, each contributing to the understanding of how these characteristics were  
 190 associated with the presence of ASC or cervical cytological abnormalities among the participants.

191 **Table 1.** Characteristics of samples based on with and without cervical cytological abnormalities  
 192 (categorical variables)

| Variables                               | With cytological abnormalities<br>(n, %) | Without cytological abnormalities<br>(n, %) | p-value            | Odd ratio<br>(95%CI) |
|-----------------------------------------|------------------------------------------|---------------------------------------------|--------------------|----------------------|
| <b>Marital Status (n=239)</b>           |                                          |                                             |                    |                      |
| Divorced                                | 7 (8.8%)                                 | 73 (91.3%)                                  | 0.492              | -                    |
| Married                                 | 18 (12.8%)                               | 123 (87.2%)                                 |                    |                      |
| Single                                  | 1 (5.6%)                                 | 17 (94.4%)                                  |                    |                      |
| <b>Education (n=239)</b>                |                                          |                                             |                    |                      |
| <High School                            | 8 (9.1%)                                 | 80 (90.9%)                                  | 0.498 <sup>a</sup> | -                    |
| ≥High School                            | 18 (11.9%)                               | 133 (88.1%)                                 |                    |                      |
| <b>Occupation</b>                       |                                          |                                             |                    |                      |
| Unemployed                              | 11 (15.5%)                               | 60 (84.5%)                                  | 0.136 <sup>a</sup> | 0.535 (0.232-1.230)  |
| Employed                                | 15 (8.9%)                                | 153 (91.1%)                                 |                    |                      |
| <b>Alcohol (n=239)</b>                  |                                          |                                             |                    |                      |
| Yes                                     | 0 (0%)                                   | 1 (100.0%)                                  | 1.000 <sup>b</sup> | -                    |
| No                                      | 26 (10.9%)                               | 212 (89.1%)                                 |                    |                      |
| <b>Contraception (n=239)</b>            |                                          |                                             |                    |                      |
| Yes                                     | 17 (14.5%)                               | 100 (85.5%)                                 | 0.076 <sup>a</sup> | 2.134 (0.911-5.002)  |
| No                                      | 9 (7.4%)                                 | 113 (92.6%)                                 |                    |                      |
| <b>Number of Sexual Partner (n=239)</b> |                                          |                                             |                    |                      |
| ≥5                                      | 6 (8.5%)                                 | 65 (91.5%)                                  | 0.433 <sup>a</sup> | -                    |
| <5                                      | 20 (11.9%)                               | 148 (88.1%)                                 |                    |                      |
| <b>Sexual debut year (n=239)</b>        |                                          |                                             |                    |                      |
| <21                                     | 17 (10.7%)                               | 142 (89.3%)                                 | 0.896 <sup>a</sup> | -                    |
| ≥21                                     | 9 (11.3%)                                | 71 (88.8%)                                  |                    |                      |
| <b>Viral load (n=182)</b>               |                                          |                                             |                    |                      |
| Detected                                | 5 (16.1%)                                | 26 (83.9%)                                  | 0.329 <sup>a</sup> | -                    |
| Not detected                            | 14 (9.3%)                                | 137 (90.7%)                                 |                    |                      |
| <b>HIV Duration (years) (n=239)</b>     |                                          |                                             |                    |                      |

|                                               |            |             |                       |                      |
|-----------------------------------------------|------------|-------------|-----------------------|----------------------|
| ≥5                                            | 15 (9.4%)  | 145 (90.6%) | 0.288 <sup>a</sup>    | -                    |
| <5                                            | 11 (13.9%) | 68 (86.1%)  |                       |                      |
| <b>ARV Treatment Duration (Years) (n=239)</b> |            |             |                       |                      |
| ≤1                                            | 6 (15.0%)  | 34 (85.0%)  | <u>0.242</u>          | -                    |
| 2-4                                           | 7 (15.9%)  | 37 (84.1%)  |                       |                      |
| ≥5                                            | 13 (8.4%)  | 142 (91.6%) |                       |                      |
| <b>Smoking status (n=239)</b>                 |            |             |                       |                      |
| Yes                                           | 3 (9.7%)   | 28 (90.3%)  | 1.000 <sup>b</sup>    | -                    |
| No                                            | 23 (11.1%) | 185 (88.9%) |                       |                      |
| <b>HPV infection history (n=239)</b>          |            |             |                       |                      |
| Yes                                           | 4 (18.2%)  | 18 (81.8%)  | 0.274 <sup>b</sup>    | -                    |
| No                                            | 22 (10.1%) | 195 (89.9%) |                       |                      |
| <b>Pap smear history (n=239)</b>              |            |             |                       |                      |
| Yes                                           | 7 (5.6%)   | 119 (94.4%) | 0.005 <sup>***a</sup> | 0.291 (0.117-0.721)  |
| No                                            | 19 (19.8%) | 94 (83.2%)  |                       |                      |
| <b>HPV Vaccine Status (n=239)</b>             |            |             |                       |                      |
| No                                            | 26 (11.1%) | 208 (88.9%) | 1.000 <sup>b</sup>    | -                    |
| Yes                                           | 0 (0%)     | 5 (100%)    |                       |                      |
| <b>Gravidity (n=239)</b>                      |            |             |                       |                      |
| No gravidity                                  | 2 (7.7%)   | 24 (92.3%)  |                       |                      |
| ≤2                                            | 12 (9.2%)  | 118 (90.8%) | 0.420                 | -                    |
| >2                                            | 12 (14.5%) | 71 (85.5%)  |                       |                      |
| <b>Hormonal medication (n=239)</b>            |            |             |                       |                      |
| Yes                                           | 1 (25%)    | 3 (75%)     | 0.371 <sup>b</sup>    | -                    |
| No                                            | 25 (10.6)  | 210 (89.4%) |                       |                      |
| <b>Abortion (n=239)</b>                       |            |             |                       |                      |
| Yes                                           | 7 (8%)     | 81 (92%)    | 0.268 <sup>a</sup>    | -                    |
| No                                            | 19 (12.6%) | 132 (87.4%) |                       |                      |
| <b>History of STDs (n=239)</b>                |            |             |                       |                      |
| Yes                                           | 4 (19%)    | 17 (81%)    | 0.260 <sup>b</sup>    | -                    |
| No                                            | 22 (10.1%) | 196 (89.9%) |                       |                      |
| <b>Menopause (n=239)</b>                      |            |             |                       |                      |
| Yes                                           | 1 (4%)     | 24 (96%)    | 0.328 <sup>b</sup>    | -                    |
| No                                            | 25 (11.7%) | 189 (88.3%) |                       |                      |
| <b>Universal HPV DNA results (n=239)</b>      |            |             |                       |                      |
| HPV (+)                                       | 18 (31.0%) | 40 (69.0%)  | 0.000 <sup>a**</sup>  | 9.731 (3.952-23.959) |
| HPV (-)                                       | 8 (4.4%)   | 173 (95.6%) |                       |                      |

193 <sup>a</sup>analysed by chi-square test

194 <sup>b</sup>analysed by fisher's exact test

195

196 Based on Table 2, it was found that the average age of participants with cytological  
 197 abnormalities was slightly younger at 35.5 years compared to 38 years for those without these  
 198 conditions, although this difference was not statistically significant. Notably, the CD4 cell count  
 199 showed a significant difference, with a median count of 415 cells/uL in those with Cytological  
 200 abnormalities versus 556 cells/uL in those without, suggesting a lower immune status in the  
 201 affected group. Similarly, the percentage of CD4 cells was significantly lower in participants with  
 202 Cytological abnormalities, averaging 21.34%, compared to 26.62% in those without, further  
 203 indicating compromised immune function in the former group. The CD8 cell count and percentage  
 204 did not show significant differences. However, the CD4/CD8 ratio was significantly lower in  
 205 participants with Cytological abnormalities, with a median of 0.43 compared to 0.63 in those  
 206 without, underscoring a more pronounced immune system imbalance in those with cervical  
 207 abnormalities.

208 **Table 2.** Characteristics of samples based on with and without cervical cytological abnormalities

| Variables     | With cytological abnormalities (mean±SD or median (min-max)) | Without cytological abnormalities (mean±SD or median (min-max)) | p-value (CI95%)                      |
|---------------|--------------------------------------------------------------|-----------------------------------------------------------------|--------------------------------------|
| Age (years)   | 35.5 (27-47)                                                 | 38 (24-50)                                                      | 0.330 <sup>c</sup>                   |
| CD4# (sel/uL) | 415 (65-1132)                                                | 556 (103-1680)                                                  | 0.011* <sup>c</sup>                  |
| CD8# (sel/uL) | 1009 (299-2268)                                              | 857 (277-1839)                                                  | 0.398 <sup>c</sup>                   |
| CD4%          | 21.34±9.87                                                   | 26.62±8.63                                                      | 0.004** (1.6918-8.8726) <sup>d</sup> |
| CD8%          | 46.86 (18.42-68.18)                                          | 39.62 (20.28-74.31)                                             | 0.013* <sup>c</sup>                  |
| CD4/CD8 Ratio | 0.43 (0.13-1.41)                                             | 0.63 (0.07-1.75)                                                | 0.005*** <sup>c</sup>                |

209 <sup>c</sup>analysed by mann-whitney test

210 <sup>d</sup>analysed by independent T-test

211 \*p<0.05

212

213 Since there were eight non-typeable samples, we only included 231 samples to identify the  
 214 risk factors of high-risk HPV infection in women living HIV. Based on Table 3, the characteristics  
 215 of samples with and without high-risk HPV infection were analyzed. It was found that marital  
 216 status varied, with divorced participants making up 22.1% of those with HPV and 77.9% of those  
 217 without. Married participants constituted 20.3% of the HPV-positive group and 79.7% of the HPV-  
 218 negative group, while single participants represented 31.3% of those with HPV and 68.8% without.  
 219 Education levels also showed differences; those with less than high school education made up  
 220 19.8% of the HPV-positive group and 80.2% of the HPV-negative group. Regarding contraception



221 use, 25.2% of those using contraception were HPV-positive compared to 74.8% who were  
 222 negative. The number of sexual partners also correlated with HPV status; 27.3% of those with  
 223 more than five partners were HPV-positive.

224

225 **Table 3.** Characteristics of samples with and without high-risk HPV infection

| Variables                                            | HPV (+) (n, %) | HPV (-) (n, %) | p-value                    | Odd ratio (95%CI)   |
|------------------------------------------------------|----------------|----------------|----------------------------|---------------------|
| <b><i>Marital Status (n=231)</i></b>                 |                |                |                            |                     |
| Divorced                                             | 17 (22.1%)     | 60 (77.9%)     | 0.598                      | -                   |
| Married                                              | 28 (20.3%)     | 110 (79.7%)    |                            |                     |
| Single                                               | 5 (31.3%)      | 11 (68.8%)     |                            |                     |
| <b><i>Education (n=231)</i></b>                      |                |                |                            |                     |
| <High School                                         | 17 (19.8%)     | 69 (80.2%)     | 0.594 <sup>a</sup>         | -                   |
| ≥High School                                         | 33 (22.8%)     | 112 (77.2%)    |                            |                     |
| <b><i>Occupation (n=231)</i></b>                     |                |                |                            |                     |
| Unemployed                                           | 17 (23.9%)     | 54 (76.1%)     | 0.572 <sup>a</sup>         | -                   |
| Employed                                             | 33 (20.6%)     | 127 (79.4%)    |                            |                     |
| <b><i>Alcohol (n=231)</i></b>                        |                |                |                            |                     |
| Yes                                                  | 1 (100%)       | 0 (0%)         | <u>0.216<sup>b</sup></u>   | 4.694 (3.662-6.017) |
| No                                                   | 49 (21.3%)     | 181 (78.7%)    |                            |                     |
| <b><i>Contraception (n=231)</i></b>                  |                |                |                            |                     |
| Yes                                                  | 28 (25.2%)     | 83 (74.8%)     | <u>0.204<sup>a</sup></u>   | 1.376 (0.839-2.258) |
| No                                                   | 22 (18.3%)     | 98 (81.7%)     |                            |                     |
| <b><i>Number of Sexual Partner (n=231)</i></b>       |                |                |                            |                     |
| ≥5                                                   | 18 (27.3%)     | 48 (72.7%)     | <u>0.189<sup>a</sup></u>   | 1.406 (0.851-2.323) |
| <5                                                   | 32 (19.4%)     | 133 (80.6%)    |                            |                     |
| <b><i>Sexual debut year (n=231)</i></b>              |                |                |                            |                     |
| <21                                                  | 38 (24.7%)     | 116 (75.3%)    | <u>0.114<sup>a</sup></u>   | 0.632 (0.351-1.138) |
| ≥21                                                  | 12 (15.6%)     | 65 (84.8%)     |                            |                     |
| <b><i>Viral load (n=176)</i></b>                     |                |                |                            |                     |
| Detected                                             | 7 (23.3%)      | 23 (76.7%)     | 0.672 <sup>a</sup>         | -                   |
| Not detected                                         | 29 (19.9%)     | 117 (80.1%)    |                            |                     |
| <b><i>HIV Duration (years) (n=231)</i></b>           |                |                |                            |                     |
| ≥5                                                   | 21 (13.6%)     | 133 (86.4%)    | <u>0.000<sup>**a</sup></u> | 0.362 (0.222-0.591) |
| <5                                                   | 29 (37.7%)     | 48 (62.3%)     |                            |                     |
| <b><i>ARV Treatment Duration (Years) (n=231)</i></b> |                |                |                            |                     |
| ≤1                                                   | 20 (52.6%)     | 18 (47.4%)     | <u>0.000<sup>**</sup></u>  | -                   |

|                                      |            |             |                    |                     |
|--------------------------------------|------------|-------------|--------------------|---------------------|
| 2-4                                  | 11 (25.6%) | 32 (74.4%)  |                    |                     |
| ≥5                                   | 19 (12.7%) | 131 (87.3%) |                    |                     |
| <b>Smoking status (n=231)</b>        |            |             |                    |                     |
| Yes                                  | 8 (26.7%)  | 22 (73.3%)  | 0.480 <sup>a</sup> | -                   |
| No                                   | 42 (20.9%) | 159 (79.1%) |                    |                     |
| <b>HPV infection history (n=231)</b> |            |             |                    |                     |
| Yes                                  | 6 (27.3%)  | 16 (72.7%)  | 0.586 <sup>b</sup> | -                   |
| No                                   | 44 (21.1%) | 165 (78.9%) |                    |                     |
| <b>Pap smear history (n=231)</b>     |            |             |                    |                     |
| Yes                                  | 17 (14.2%) | 103 (85.8%) | <u>0.004**a</u>    | 0.477 (0.282-0.806) |
| No                                   | 33 (29.7%) | 78 (70.3%)  |                    |                     |
| <b>HPV Vaccine Status (n=231)</b>    |            |             |                    |                     |
| No                                   | 50 (22.1%) | 176 (77.9%) | 0.588 <sup>b</sup> |                     |
| Yes                                  | 0 (0%)     | 5 (100%)    |                    |                     |
| <b>Gravidity (n=231)</b>             |            |             |                    |                     |
| No gravidity                         | 10 (40%)   | 15 (60%)    | <u>0.060</u>       |                     |
| ≤2                                   | 25 (20%)   | 100 (80%)   |                    |                     |
| >2                                   | 15 (18.5%) | 66 (81.5%)  |                    |                     |
| <b>Hormonal medication (n=231)</b>   |            |             |                    |                     |
| Yes                                  | 3 (75%)    | 1 (25%)     | <u>0.033*b</u>     | 3.622 (1.948-6.737) |
| No                                   | 47 (20.7%) | 180 (79.3%) |                    |                     |
| <b>Abortion (n=231)</b>              |            |             |                    |                     |
| Yes                                  | 15 (17.4%) | 71 (82.6%)  | <u>0.232a</u>      | 0.723 (0.420-1.244) |
| No                                   | 35 (24.1%) | 110 (75.9%) |                    |                     |
| <b>History of STDs (n=231)</b>       |            |             |                    |                     |
| Yes                                  | 6 (28.6%)  | 15 (71.4%)  | 0.412 <sup>b</sup> |                     |
| No                                   | 44 (21%)   | 166 (79%)   |                    |                     |
| <b>Menopause (n=231)</b>             |            |             |                    |                     |
| Yes                                  | 4 (16%)    | 21 (84%)    | 0.468 <sup>b</sup> |                     |
| No                                   | 46 (22.3%) | 160 (77.7%) |                    |                     |

226 <sup>a</sup>analysed by chi-square test

227 <sup>b</sup>analysed by fisher's exact test

228

229 From the analysis presented in Table 4, key findings regarding the characteristics of samples  
 230 with and without high-risk HPV infection were observed. The age of participants did not show a  
 231 significant difference, with both HPV-positive and HPV-negative groups having a median age of  
 232 38 years. However, there was a significant difference in CD4 cell counts; participants with HPV

233 had a median CD4 count of 407 cells/uL, while those without HPV had a higher median of 594  
 234 cells/uL. This suggested a lower immune status in the HPV-positive group. Additionally, the  
 235 percentage of CD4 cells was significantly lower in the HPV-positive participants, averaging 21%  
 236 compared to 27.44% in the HPV-negative group. The CD8 cell counts were similar between the  
 237 two groups, but the CD4/CD8 ratio was significantly lower in the HPV-positive group, with a  
 238 median of 0.44 compared to 0.68 in the HPV-negative group, indicating a more pronounced  
 239 immune system imbalance in those with high-risk HPV infection.

240 **Table 4.** Characteristics of samples with and without high-risk HPV infection

| Variables     | HPV (+) (mean±SD or median (min-max)) | HPV (-) (mean±SD or median (min-max)) | p-value (CI95%)                                      |
|---------------|---------------------------------------|---------------------------------------|------------------------------------------------------|
| Age (years)   | 38 (24-48)                            | 38 (24-50)                            | 0.178 <sup>c</sup>                                   |
| CD4# (sel/uL) | 407 (65-1214)                         | 594 (103-1680)                        | 0.000 <sup>**c</sup>                                 |
| CD8# (sel/uL) | 881 (299-2268)                        | 854 (277-1839)                        | 0.602 <sup>c</sup>                                   |
| CD4%          | 21±10.53                              | 27.44±7.86                            | 0.000 <sup>**</sup> (-9.6311-(-3.2436)) <sup>d</sup> |
| CD8%          | 45.72±12.08                           | 39.16 (20.28-70.13)                   | 0.002 <sup>**c</sup>                                 |
| CD4/CD8 Ratio | 0.44 (0.11-1.75)                      | 0.68 (0.07-1.54)                      | 0.000 <sup>**c</sup>                                 |

241 <sup>c</sup>analysed by mann-whitney test

242 <sup>d</sup>analysed by independent T-test

243 \*p<0.05

244 \*\*p<0.01

245

246 ***HPV genotyping and cytology results***

247 In the study, Table 5 and Table 6 provided insights into Pap smear and HPV genotyping  
 248 results. The Pap smear results showed that 37.7% of the samples were normal, while various  
 249 abnormalities were detected: 2.5% had Atypical Squamous Cells of High Grade (ASC-H), 3.8%  
 250 had Atypical Squamous Cells of Undetermined Significance (ASC-US), 1.7% had High Grade  
 251 Squamous Intraepithelial Lesion (H-SIL), and 2.9% had Low Grade Squamous Intraepithelial  
 252 Lesion (L-SIL). The HPV genotyping revealed that HPV 18 was the most prevalent, found in  
 253 56.2% of the samples with Cytological abnormalities, significantly higher than other types. HPV  
 254 16, 51, and 52 were also detected but with lower frequencies. The results from these tables  
 255 underscored the prevalence of high-risk HPV types among women with HIV and their association  
 256 with various grades of cervical abnormalities.

257 **Table 5.** Cytological Abnormalities and HPV genotyping

| Variables | Frequency (n=239) |
|-----------|-------------------|
|-----------|-------------------|

|                                                               |             |
|---------------------------------------------------------------|-------------|
| <b>Cytological abnormalities</b>                              | 26 (10.87%) |
| Atypical squamous cells high grade (ASC-H)                    | 6 (2.5%)    |
| Atypical squamous cells of undetermined significance (ASC-US) | 9 (3.8%)    |
| High Grade Squamous Intraepithelial Lesion (H-SIL)            | 4 (1.7%)    |
| Low Grade Squamous Intraepithelial Lesion (L-SIL)             | 7 (2.9%)    |
| <b>HPV DNA universal analysis</b>                             |             |
| Positive                                                      | 58 (24.3%)  |
| Negative                                                      | 181 (75.7%) |
| <b>HPV genotyping (n=58)</b>                                  |             |
| Single genotyping                                             | 40 (69%)    |
| Double genotyping                                             |             |
| 16, 18                                                        | 2 (3.4%)    |
| 16, 52                                                        | 1 (1.7%)    |
| 18, 45                                                        | 3 (5.2%)    |
| 18, 52                                                        | 2 (3.4%)    |
| 51, 58                                                        | 1 (1.7%)    |
| 56, 58                                                        | 1 (1.7%)    |
| Untypeable                                                    | 8 (13.8%)   |
| <b>HPV genotypes (n=58)</b>                                   |             |
| HPV 16                                                        | 7 (12.1%)   |
| HPV 18                                                        | 16 (27.6%)  |
| HPV 31                                                        | 4 (6.9%)    |
| HPV 33                                                        | 1 (1.7%)    |
| HPV 45                                                        | 3 (5.2%)    |
| HPV 51                                                        | 2 (3.4%)    |
| HPV 52                                                        | 9 (15.5%)   |
| HPV 56                                                        | 9 (15.5%)   |
| HPV 58                                                        | 9 (15.5%)   |
| HPV 35,39,59,66,68                                            | 0 (0%)      |

258

259 **Table 6.** Distribution of samples into cytology groups based on HPV genotypes (n=239)

| HPV genotype      | With Cytological abnormalities (n, %) | Without Cytological abnormalities (n, %) | p-value |
|-------------------|---------------------------------------|------------------------------------------|---------|
| HPV 16 (+)        | 3 (42.9%)                             | 4 (57.1%)                                |         |
| Other than HPV 16 | 15 (29.4%)                            | 36 (70.6%)                               | 0.000** |
| Negative for HPV  | 8 (4.4%)                              | 173 (95.6%)                              |         |
| HPV 18 (+)        | 9 (56.2%)                             | 7 (43.8%)                                |         |
| Other than HPV 18 | 9 (21.4%)                             | 33 (78.6%)                               | 0.000** |

|                   |                 |                   |         |
|-------------------|-----------------|-------------------|---------|
| Negative for HPV  | 8 (4.4%)        | 173 (95.6%)       |         |
| HPV 31 (+)        | 2 (50.0%)       | 2 (50.0%)         |         |
| Other than HPV 31 | 16 (29.6%)      | 38 (70.4%)        | 0.000** |
| Negative for HPV  | 8 (4.4%)        | 173 (95.6%)       |         |
| <b>HPV 33 (+)</b> | <b>0 (0.0%)</b> | <b>1 (100.0%)</b> |         |
| Other than HPV 33 | 18 (31.6%)      | 39 (68.4%)        | -       |
| Negative for HPV  | 8 (4.4%)        | 173 (95.6%)       |         |
| HPV 45 (+)        | 1 (33.3%)       | 2 (66.7%)         |         |
| Other than HPV 45 | 17 (30.9%)      | 38 (69.1%)        | 0.000** |
| Negative for HPV  | 8 (4.4%)        | 173 (95.6%)       |         |
| HPV 51 (+)        | 1 (50.0%)       | 1 (50.0%)         |         |
| Other than HPV 51 | 17 (30.4%)      | 39 (69.6%)        | 0.000** |
| Negative for HPV  | 8 (4.4%)        | 173 (95.6%)       |         |
| HPV 52 (+)        | 4 (44.4%)       | 5 (55.6%)         |         |
| Other than HPV 52 | 14 (28.6%)      | 35 (71.4%)        | 0.000** |
| Negative for HPV  | 8 (4.4%)        | 173 (95.6%)       |         |
| HPV 58 (+)        | 0 (0.0%)        | 9 (100.0%)        |         |
| Other than HPV 58 | 18 (36.7%)      | 31 (63.3%)        | -       |
| Negative for HPV  | 8 (4.4%)        | 173 (95.6%)       |         |

260

261 **Multivariate analysis of cervical cytological abnormalities' risk factors**

262 Table 7 provided a multivariate analysis of the risk factors for cervical cytological  
 263 abnormalities in women living with HIV. The analysis revealed that HPV 18 was a significant  
 264 independent risk factor, with an exponent (B) of 9.029 and a p-value of 0.007, indicating a strong  
 265 association between HPV 18 infection and the presence of cervical abnormalities. Other HPV  
 266 types such as HPV 16, 31, 45, 51, and 52 were also analyzed, but they did not show significant  
 267 associations as their p-values were higher, suggesting less impact on the risk of cervical cytological  
 268 abnormalities. Additionally, a history of Pap smear screening showed a trend towards reducing the  
 269 risk of cervical abnormalities, although it was not statistically significant with a p-value of 0.083.  
 270 The analysis underscored the critical role of HPV 18 in contributing to cervical cytological  
 271 abnormalities among women with HIV and highlighted the potential protective effect of regular  
 272 Pap smear screenings.

273

274 **Table 7.** The effects of all the potential risk factors on the risk of cervical cytological abnormalities  
 275 in women with HIV in this study (n= 239)

| Covariates | Exponent (B) | P-value        | 95% CI                |
|------------|--------------|----------------|-----------------------|
| HPV DNA    | 2.800        | 0.177          | 0.629 – 12.45         |
| HPV 16     | 1.99         | 0.492          | 0.280 – 14.155        |
| HPV 18     | 9.029        | <b>0.007**</b> | <b>1.835 – 44.425</b> |
| HPV 31     | 3.908        | 0.300          | 0.298 – 51.317        |

|                                         |       |       |                 |
|-----------------------------------------|-------|-------|-----------------|
| HPV 45                                  | 0.617 | 0.745 | 0.034 – 11.327  |
| HPV 51                                  | 8.295 | 0.200 | 0.327 – 210.262 |
| HPV 52                                  | 3.277 | 0.207 | 0.519 – 20.680  |
| Papsmear history                        | 0.374 | 0.083 | 0.123 – 1.138   |
| ARV treatment duration ( $\leq 1$ year) | 0.388 | 0.212 | 0.088 – 1.718   |
| Contraception history                   | 2.710 | 0.065 | 0.940 – 7.809   |
| Occupation (unemployed)                 | 1.845 | 0.250 | 0.650 – 5.235   |
| CD4:CD8 ratio                           | 0.378 | 0.234 | 0.076 – 1.876   |

276

277 ***Multivariate analysis of high-risk HPV infection risk factors***

278 Table 8 presented a multivariate analysis of the risk factors for high-risk HPV infection in  
 279 women living with HIV. The findings indicated that a history of contraception use was marginally  
 280 significant as a risk factor, with an exponent (B) of 2.189 and a p-value of 0.053, suggesting a  
 281 potential association with increased risk of HPV infection. The number of sexual partners and the  
 282 age at sexual debut did not show significant associations with HPV infection, as indicated by their  
 283 p-values. Notably, a history of Pap smear screening was significantly associated with a reduced  
 284 risk of high-risk HPV infection, with an exponent (B) of 0.358 and a p-value of 0.013, highlighting  
 285 the protective effect of regular screening. The duration of ARV treatment and other factors like  
 286 gravidity, abortion, and hormonal treatment did not show significant associations with HPV risk.  
 287 This analysis underscored the importance of Pap smear history in reducing the risk of HPV  
 288 infection among women with HIV.

289

290 **Table 8.** The effects of all the potential risk factors on the risk of high-risk HPV infection in  
 291 women with HIV in this study (n= 231)

| Covariates                                     | Exponent<br>(B) | P-value       | 95% CI          |
|------------------------------------------------|-----------------|---------------|-----------------|
| Contraception history                          | 2.189           | 0.053         | 0.989 – 4.845   |
| Number of sexual partner ( $\geq 5$<br>people) | 1.368           | 0.463         | 0.592 – 3.161   |
| Sexual debut year ( $\geq 21$ years old)       | 0.573           | 0.218         | 0.236 – 1.390   |
| HIV duration ( $\geq 5$ years)                 | 0.542           | 0.388         | 0.135 – 2.175   |
| ARV treatment duration ( $\leq 1$<br>year)     | 2.504           | 0.239         | 0.544 – 11.519  |
| Pap smear History                              | 0.358           | <b>0.013*</b> | 0.160 – 0.802   |
| Gravidity ( $> 2$ times)                       | 0.481           | 0.239         | 0.142 – 1.628   |
| Abortion                                       | 0.682           | 0.360         | 0.301 – 1.546   |
| Hormonal treatment                             | 8.319           | 0.106         | 0.637 – 108.736 |
| Age                                            | 1.020           | 0.522         | 0.960 – 1.084   |
| CD4:CD8                                        | 0.349           | 0.093         | 0.103 – 1.190   |

292

## 293 **Discussion**

### 294 *HR-HPV 18 as a risk factor of cervical abnormalities in women living with HIV*

295 Our study found that HR-HPV 18 as the only significant risk factor of cervical cytological  
296 abnormalities, potential of cervical cancer. However, a meta-analysis 2021 represents a different  
297 scenario where HPV 16 was identified as the most prevalent genotype, particularly in the regions  
298 of India, Thailand, and China.(9) Another study of meta-analysis about HPV genotypes in Kenya  
299 also showed that HPV 16 as the most common infection, with HPV 18 came second. HPV 16 was  
300 consistently identified as the most prevalent genotype in women with abnormal cytology and ICC.  
301 For instance, in women with abnormal cytology, HPV 16 was found to be present in 26% of cases,  
302 and in women with ICC, its prevalence increased to 37%.(10) This indicates a clear escalation in  
303 the prevalence of HPV 16 as the severity of cervical disease increases. Following HPV 16, HPV  
304 18 is the second most common genotype in ICC cases, with a prevalence of 24%. This discrepancy  
305 highlights the geographical and demographic variations in HPV genotype distribution, which is a  
306 crucial factor in understanding the epidemiology of HPV and its associated risks for cervical  
307 cancer.

308 HPV 18, along with HPV 16, belongs to the high-risk category of HPV genotypes that are  
309 strongly associated with the development of cervical cancer. These genotypes are known for their  
310 ability to integrate into the host cell DNA, disrupting normal cell functions and leading to the  
311 progression of precancerous lesions to invasive cancer.(11) The variation in prevalence between  
312 our findings and the previous studies could be attributed to differences in study populations,  
313 methodologies, or regional public health practices such as the prevalence of vaccination and  
314 screening. This underlines the importance of localized data to inform public health strategies  
315 effectively. For regions where HPV 18 is more prevalent, targeted interventions to address this  
316 specific risk factor are crucial.(10) This includes promoting HPV vaccination that covers HPV 18,  
317 enhancing screening programs to detect and treat precancerous changes early, and educating the  
318 public and healthcare providers about the risks associated with HPV 18.

### 319 *Pap smear as an effective preventive measure of cervical cancer*

320 The Pap smear is a critical preventive measure for cervical cancer, particularly significant  
321 for HIV-seropositive women in developing countries. As a cytological-based test, the Pap smear  
322 has been extensively utilized in developed countries for many years, demonstrating substantial  
323 success in reducing both the incidence and mortality of cervical cancer.(12)

324 One of the primary benefits of the Pap smear is its ability to detect precancerous changes in  
325 the cervix, known as cervical intraepithelial neoplasia (CIN), at an early stage. Early detection  
326 allows for the effective treatment of these changes before they have the chance to progress to  
327 cancer. Consequently, this early intervention significantly contributes to the reduction in mortality  
328 associated with cervical cancer, as treatments tend to be more effective at earlier stages.(5,13)

329 Moreover, the Pap smear is a cost-effective procedure. It does not require highly specialized  
330 equipment, which makes it a viable option for many healthcare settings, including those with  
331 limited resources typical of developing countries. The success of the Pap smear in developed  
332

333 countries highlights its potential effectiveness when implemented with regular screenings and  
334 proper follow-up care.(5)

335 Despite its benefits, the implementation of the Pap smear in developing countries faces  
336 several challenges. These include a lack of proper infrastructure, insufficient qualified personnel,  
337 and limited resources, which can impede the utilization and effectiveness of the Pap smear.(5)  
338 Nonetheless, it remains a cornerstone of cervical cancer prevention strategies. There is a pressing  
339 need to improve its accessibility and integration into healthcare systems, especially for populations  
340 at higher risk, such as HIV-seropositive women.

341 This study is not without limitation. The cross-sectional nature of this research did indeed  
342 restrict the ability to establish causal relationships between high-risk HPV infection and cervical  
343 cytological abnormalities. The reliance on self-reported data for certain demographic and  
344 behavioral factors might also affect the accuracy of the information collected. This study was  
345 conducted in specific region in Indonesia, that was bali, which may not account for regional  
346 variations in HPV prevalence in Indonesia; nonetheless, this study proved that in Bali, a different  
347 type of HPV was found to be more prevalent than the usual high-risk HPV found in other areas in  
348 the world.

349

## 350 **Conclusions**

351 Our research found HR-HPV 18 as a significant risk factor for cervical cytological  
352 abnormalities and potentially, cervical cancer in women living with HIV, supporting the indicative  
353 measure for a routine pap-smear screening in this specified population. Along with the pap smear,  
354 vaccination for HR-HPV 18 also becomes urgently important to be readily supplied in Indonesia.

355

## 356 **Competing interests**

357 No competing interests is declared in the writing of this manuscript.

358

## 359 **Authors' contributions**

360 We would like to thank our outstanding team who have helped us in completing this research;  
361 Study committee: TREAT Asia: Annette Sohn, Thida Chanyachukul; Kirby Institute: Kathy  
362 Petoumenos; Molecular Biology Laboratory Udayana University: Ida Bagus Nyoman Putra Dwija;  
363 Pathology Anatomy Faculty of Medicine Udayana University: Nyoman Winarti; Prof Ngoerah  
364 Hospital VCT Clinic: Komang Sutarni, Made Ratni; WM Medika Clinic - Kerti Praja Foundation  
365 Denpasar: Ni Made Vidia Pratiwi, Ni Kadek Ayu Astuti; Social workers accompanying PLWHA  
366 at VCT Prof Ngoerah Denpasar: ketut Rediten, Dedi Junaedi, Afrina Dili Astuti.

367

## 368 **Funding**

369 This study is supported by the U.S. National Institutes of Health's National Institute of Allergy  
370 and Infectious Diseases, the Eunice Kennedy Shriver National Institute of Child Health and  
371 Human Development, the National Cancer Institute, the National Institute of Mental Health, the  
372 National Institute on Drug Abuse, the National Heart, Lung, and Blood Institute, the National



373 Institute on Alcohol Abuse and Alcoholism, the National Institute of Diabetes and Digestive and  
374 Kidney Diseases, and the Fogarty International Center, as part of the International Epidemiology  
375 Databases to Evaluate AIDS (IeDEA; U01AI069907). The content of this publication is solely the  
376 responsibility of the authors and does not necessarily represent the official views of any of the  
377 governments or institutions mentioned above.

378

## 379 **References**

380

- 381 1. Stelzle D, Tanaka LF, Lee KK, Ibrahim Khalil A, Baussano I, Shah ASV, et al. Estimates  
382 of the global burden of cervical cancer associated with HIV. *Lancet Glob Health*. 2021 Feb  
383 1;9(2):e161–9.
- 384 2. Jin ZY, Liu X, Ding YY, Zhang ZF, He N. Cancer risk factors among people living with  
385 HIV/AIDS in China: A systematic review and meta-analysis. *Sci Rep*. 2017 Dec 1;7(1).
- 386 3. Rohner E, Bütikofer L, Schmidlin K, Sengayi M, Maskew M, Giddy J, et al. Cervical cancer  
387 risk in women living with HIV across four continents: A multicohort study. *Int J Cancer*.  
388 2020 Feb 1;146(3):601–9.
- 389 4. WHO. Tackling NCDs: ‘best buys’ and other recommended interventions for the prevention  
390 and control of noncommunicable diseases; updated (2017) appendix 3 of the Global Action  
391 Plan for prevention and control of noncommunicable diseases 2013–2020. 2017;
- 392 5. Robbers GML, Bennett LR, Spagnoletti BRM, Wilopo SA. Facilitators and barriers for the  
393 delivery and uptake of cervical cancer screening in Indonesia: a scoping review. Vol. 14,  
394 *Global Health Action*. Taylor and Francis Ltd.; 2021.
- 395 6. Kementean Kesehatan RI Indonesia. Kementerian Kesehatan RI. Profil Kesehatan  
396 Indonesia 2016 Kementerian Kesehatan Indonesia [Internet]. 2017.
- 397 7. Ogu CO, Achukwu PU, Nkwo PO. Prevalence and risk factors of Cervical Cytological  
398 abnormalities among human immunodeficiency virus sero-positive females on highly active  
399 antiretroviral therapy in Enugu, Southeastern, Nigeria. *Asian Pacific Journal of Cancer*  
400 *Prevention*. 2019;20(10):2987–94.
- 401 8. WHO. WHO guideline for screening and treatment of cervical pre-cancer lesions for  
402 cervical cancer prevention. 2021.
- 403 9. Verrier F, Le Coeur S, Delory T. Cervical human papillomavirus infection (Hpv) and high  
404 oncogenic risk genotypes among women living with hiv in asia: A meta-analysis. Vol. 10,  
405 *Journal of Clinical Medicine*. MDPI; 2021.
- 406 10. Menon S, Wusiman A, Boily MC, Kariisa M, Mabeya H, Luchters S, et al. Epidemiology  
407 of HPV genotypes among HIV positive women in Kenya: A systematic review and meta-  
408 analysis. *PLoS One*. 2016 Oct 1;11(10).
- 409 11. Freitas BC, Suehiro TT, Consolaro MEL, Silva VRS. HPV infection and cervical  
410 abnormalities in HIV positive women in different regions of Brazil, a middle-income  
411 country. *Asian Pacific Journal of Cancer Prevention*. 2016;16(18):8085–91.

- 412 12. Mapanga W, Girdler-Brown B, Feresu SA, Chipato T, Singh E. Prevention of cervical  
413 cancer in HIV-seropositive women from developing countries through cervical cancer  
414 screening: A systematic review. Vol. 7, Systematic Reviews. BioMed Central Ltd.; 2018.
- 415 13. Asangbeh-Kerman SL, Davidović M, Taghavi K, Kachingwe J, Rammipi KM, Muzingwani  
416 L, et al. Cervical cancer prevention in countries with the highest HIV prevalence: a review  
417 of policies. BMC Public Health. 2022 Dec 1;22(1).
- 418
